# Supplementary material for: Exploring Differential Connexin Expression across Melanocytic Tumor Progression Involving the Tumor Microenvironment
Source: MDPI journal article supplement (doi:10.3390/cancers11020165), 2019-02-01
Supplement: s1 [file s1]

# Supplementary material: Exploring Differential Connexin Expression Across Melanocytic Tumor Progression Involving the Tumor Microenvironment

Gergo Kiszner, Peter Balla, Barna Wichmann, Gabor Barna, Kornelia Baghy, Istvan Balazs Nemeth, Erika Varga, Istvan Furi, Bela Toth and Tibor Krenacs

**Table S1.** Antibodies tested in human skin tissues but were not found to be specific or reliable in this study.

| Connexin Gene | Connexin Protein | Antibody                                                         | Dilution |
|---------------|------------------|------------------------------------------------------------------|----------|
| GJA1          | Cx43             | Anti-Cx43, mouse clone CXN-6<br>Santa Cruz sc-59949              | 1:300    |
| GJA5          | Cx40             | Anti-40 (H-116) rabbit polyclonal<br>Santa Cruz sc-28658         | 1:75     |
| GJB3          | Cx31             | Anti-GJB3, mouse clone 3B4-1B3<br>Sigma-Aldrich WH0002707M1      | 1:350    |
| GJB4          | Cx30.3           | Anti-GJB4, mouse clone 1E3-1C12<br>Sigma-Aldrich WH0127534M1     | 1:1800   |
| GJB7          | Cx25             | Anti-GJB7 (96-110) rabbit polyclonal<br>Sigma-Aldrich SAB1103736 | 1:1000   |
| GJC2          | Cx47             | Anti-GJC2 rabbit polyclonal<br>Sigma-Aldrich SAB2100924          | 1:200    |
| GJC3          | Cx30.2           | Anti-GJC3 rabbit polyclonal<br>Sigma-Aldrich HPA015024           | 1:50     |
| GJD2          | Cx36             | Anti-GJD2 rabbit polyclonal<br>Sigma-Aldrich HPA014355           | 1:50     |
| GJD3          | Cx31.9           | Anti-GJD3 rabbit polyclonal<br>Sigma-Aldrich HPA043159           | 1:200    |

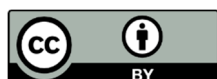

© 2019 by the authors. Licensee MDPI, Basel, Switzerland. This article is an open access article distributed under the terms and conditions of the Creative Commons Attribution (CC BY) license (<http://creativecommons.org/licenses/by/4.0/>).
